# Supplementary material
Source: publisher figshare collection journal article supplement (https://acs.figshare.com/ndownloader/files/4036561)
Supplement: Supplementary file 1 [file 4036561]

# First Principles Modeling of Mixed Halide Organometal Perovskites for Photovoltaic Applications

*Edoardo Mosconi,<sup>a,\*</sup> Anna Amat,<sup>a</sup> Md. K. Nazeeruddin,<sup>b</sup> Michael Grätzel,<sup>b</sup> Filippo De Angelis<sup>a,\*</sup>*

<sup>a</sup> Computational Laboratory for Hybrid/Organic Photovoltaics (CLHYO), CNR-ISTM, I-06123, Perugia, Italy.

<sup>b</sup> Laboratory for Photonics and Interfaces, Institute of Chemical Sciences and Engineering, School of Basic Science, Swiss Federal Institute of Technology, CH-1015 Lausanne, Switzerland.

## **SUPPORTING INFORMATION**

1. Starting configurations for structure 1 and 2

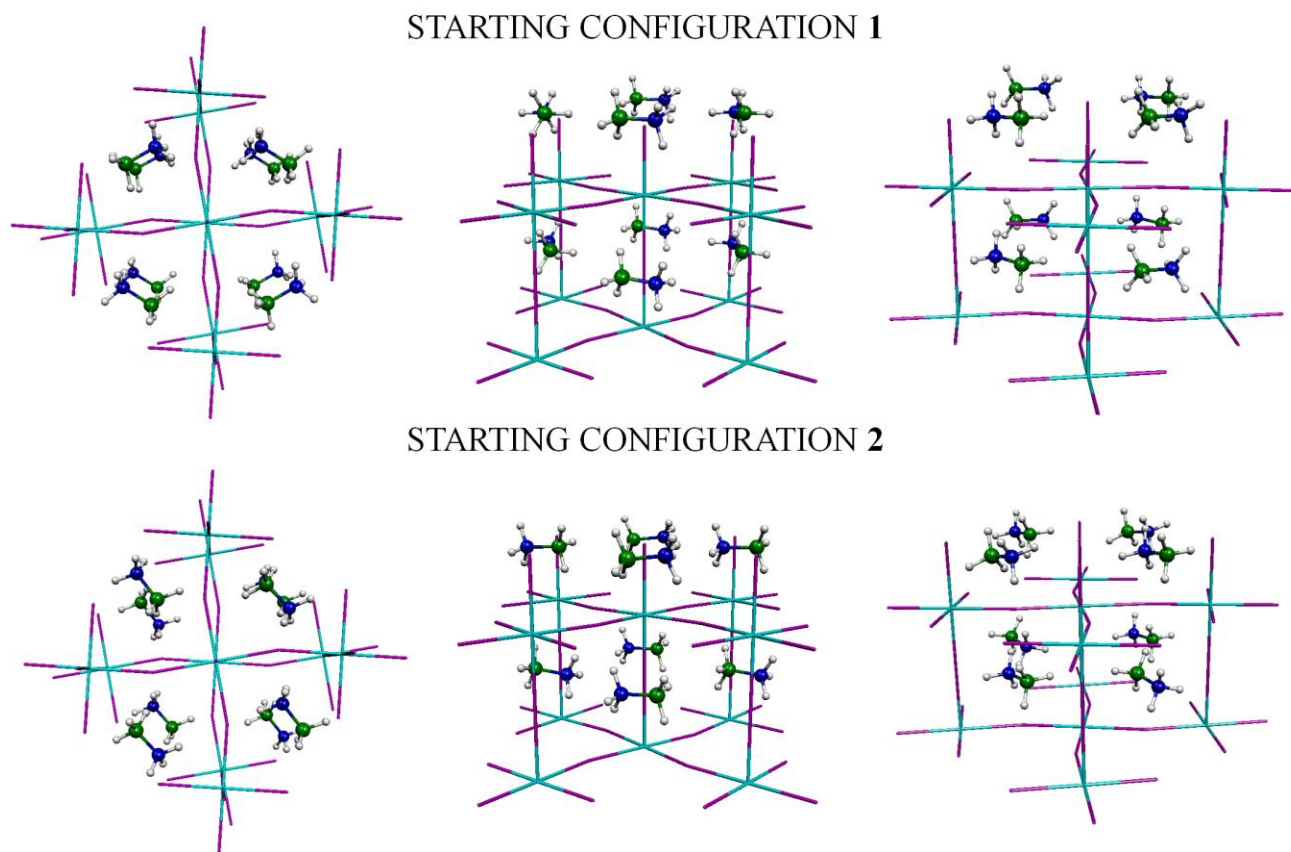

**Figure S1.** Starting configuration for structure 1 and 2. The X = I case is reported from three different points of view: XY plane, left; YZ plane, center; XZ plane, right.

2. Computational Calibration

To further check the adequacy of the method we tested a more extended Monkhorst–Pack grid of 6x6x6 and 8x8x8 for the species CH<sub>3</sub>NH<sub>3</sub>PbI<sub>3</sub>, obtaining converging results in term of relative stability and band gap, see Table S1.

**Table S1.** Relative stability and optical band gap for CH<sub>3</sub>NH<sub>3</sub>PbI<sub>3</sub> calculated using different Monkhorst–Pack grid at 25/200 Ry as cutoff.

|                                                  | 25/200 Ry | Relative Energy [eV] |       |       | Band Gap [eV] |       |       |
|--------------------------------------------------|-----------|----------------------|-------|-------|---------------|-------|-------|
|                                                  | Grid      | 4x4x4                | 6x6x6 | 8x8x8 | 4x4x4         | 6x6x6 | 8x8x8 |
| CH <sub>3</sub> NH <sub>3</sub> PbI <sub>3</sub> | 1         | 0.00                 | 0.00  | 0.00  | 1.66          | 1.66  | 1.66  |
|                                                  | 2         | 0.06                 | 0.06  | 0.06  | 1.63          | 1.63  | 1.63  |

To further validate the accuracy of the employed method, a test using 35-240 Ry as plane-wave basis set cutoffs has been performed on the CH<sub>3</sub>NH<sub>3</sub>PbI<sub>2</sub>Cl system for the structure **1** and **2**. As shown in Table S2, the relative stability and the optical band gap calculated using different plane-wave basis set cutoffs are similar.

**Table S2.** Relative stability and the optical band gap of CH<sub>3</sub>NH<sub>3</sub>PbI<sub>2</sub>Cl calculated using different plane-wave basis set cutoff with a 4x4x4 k-point grid.

|                                                     | Cut off (Ry) | Relative Energy [eV] |             | Band Gap [eV] |             |
|-----------------------------------------------------|--------------|----------------------|-------------|---------------|-------------|
|                                                     |              | 25-200               | 35-240      | 25-200        | 35-240      |
| CH <sub>3</sub> NH <sub>3</sub> PbI <sub>2</sub> Cl | <b>1</b>     | 0.03                 | 0.03        | 1.85          | 1.83        |
|                                                     | <b>2</b>     | <b>0.00</b>          | <b>0.00</b> | <b>1.64</b>   | <b>1.64</b> |

**Table S3.** Relative stability and the optical band gap calculated using a 6x6x6 Monkhorst–Pack grid at 35/240 Ry cutoff.

| CH <sub>3</sub> NH <sub>3</sub> PbI <sub>3</sub> | 35/240 Ry | Relative Energy [eV] |             |
|--------------------------------------------------|-----------|----------------------|-------------|
|                                                  | Grid      | 6x6x6                | 6x6x6       |
|                                                  | <b>1</b>  | <b>0.00</b>          | <b>1.65</b> |
|                                                  | <b>2</b>  | 0.06                 | 1.63        |

**Table S4.** Relative stability and the optical band gap of CH<sub>3</sub>NH<sub>3</sub>PbI<sub>2</sub>Br and CH<sub>3</sub>NH<sub>3</sub>PbI<sub>2</sub>Cl calculated with a 25/200 cutoff and a 4x4x4 k-point grid, comparing experimental lattice parameters with calculated ones.

|                          | Structure | a    | b    | a     | Erel        | BG          | a    | b    | b     | Erel        | BG          |
|--------------------------|-----------|------|------|-------|-------------|-------------|------|------|-------|-------------|-------------|
| <b>PbI<sub>2</sub>Br</b> | <b>1</b>  | 8.86 | 8.86 | 11.83 | <b>0.00</b> | <b>1.89</b> | 8.86 | 8.80 | 11.80 | <b>0.00</b> | <b>1.89</b> |
|                          | <b>2</b>  |      |      |       | 0.21        | 1.63        | 8.78 | 9.04 | 11.75 | 0.16        | 1.63        |
| <b>PbI<sub>2</sub>Cl</b> | <b>1</b>  | 8.86 | 8.86 | 11.24 | 0.03        | 1.85        | 8.92 | 8.85 | 11.16 | 0.09        | 1.89        |
|                          | <b>2</b>  |      |      |       | <b>0.00</b> | <b>1.64</b> | 8.87 | 9.01 | 11.08 | <b>0.00</b> | <b>1.63</b> |

3. Density of States for all investigated systems

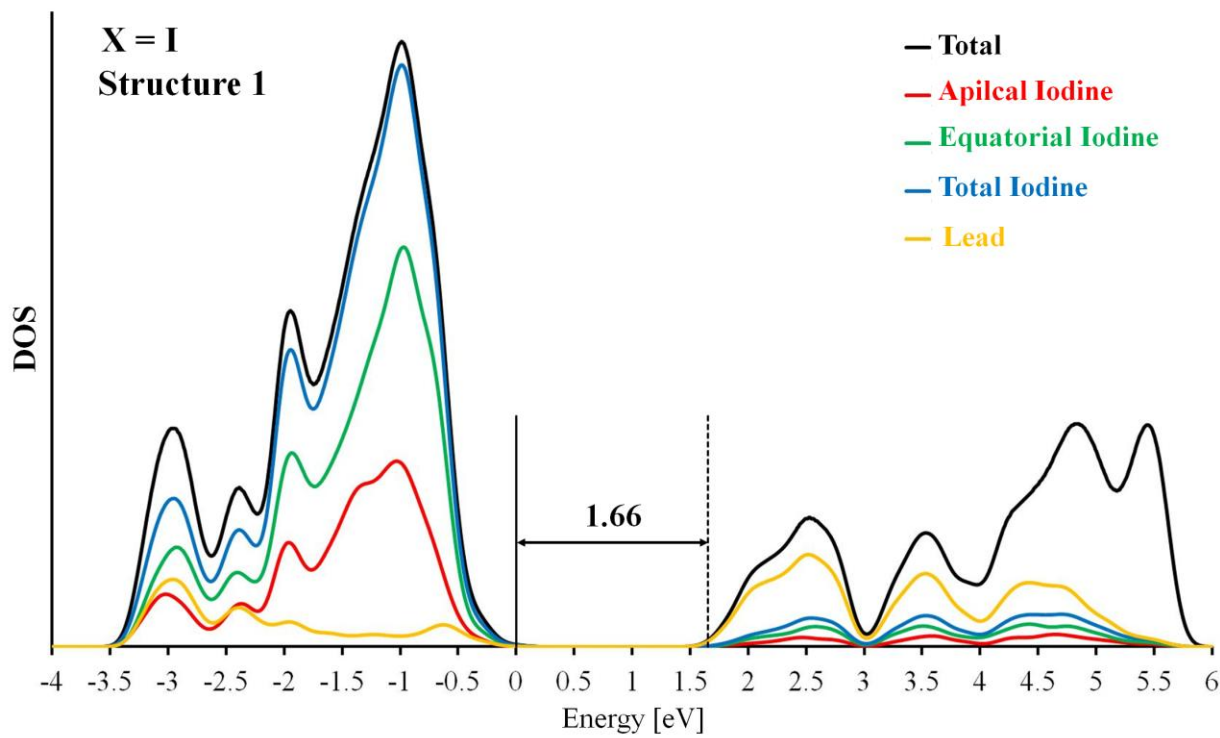

**Figure S3.** PDOS of the  $\text{PbI}_3$  structure 1. Energy values are scaled setting the HOMO level as zero.

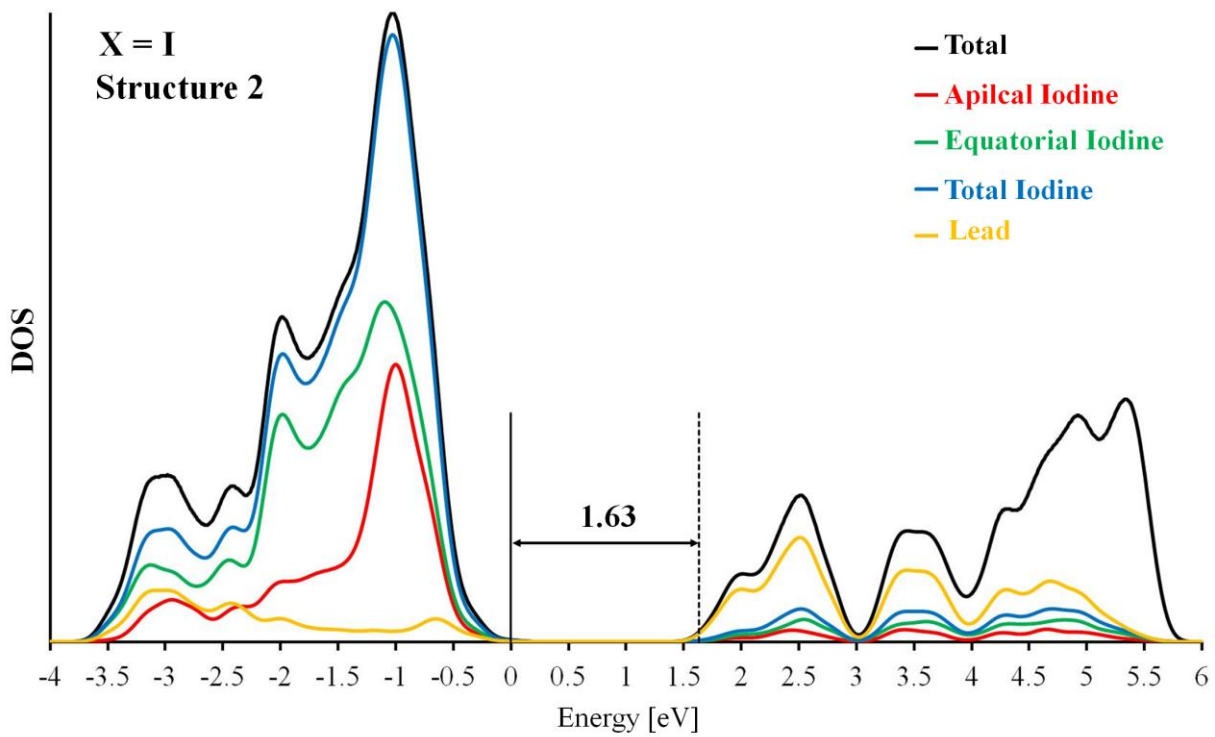

**Figure S4.** PDOS of the  $\text{PbI}_3$  structure 2. Energy values are scaled setting the HOMO level as zero.

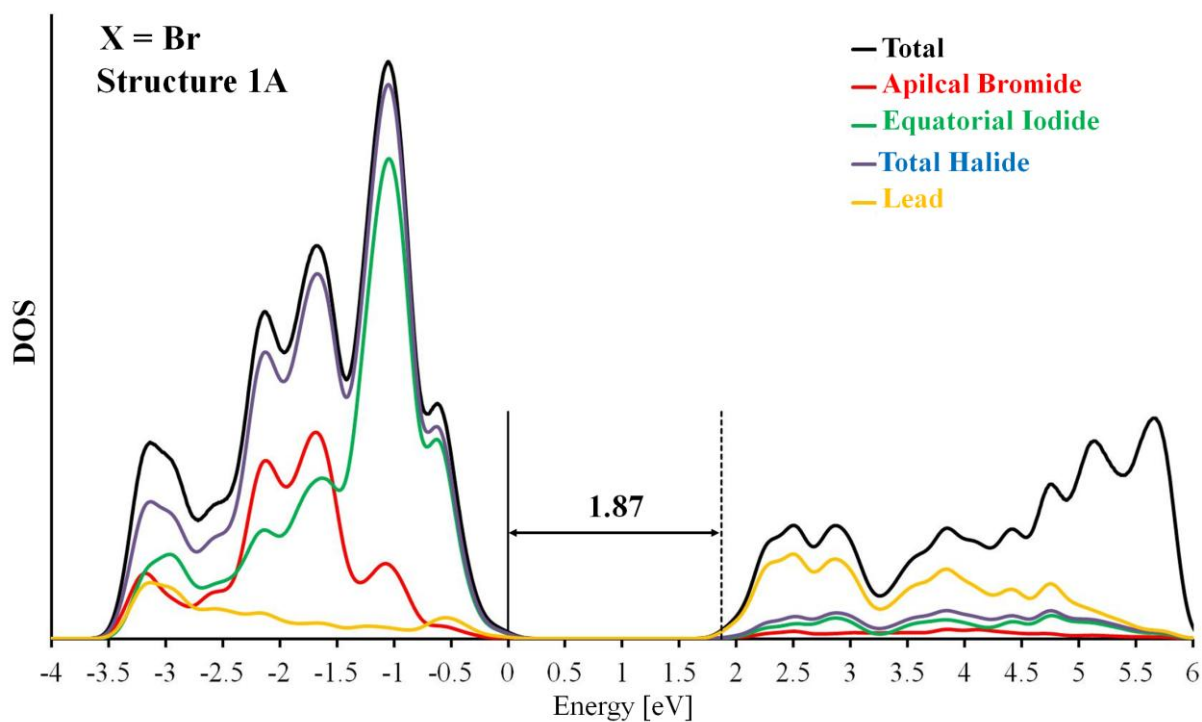

**Figure S5.** PDOS of the  $\text{PbI}_2\text{Br}$  structure 1A. Energy values are scaled setting the HOMO level as zero.

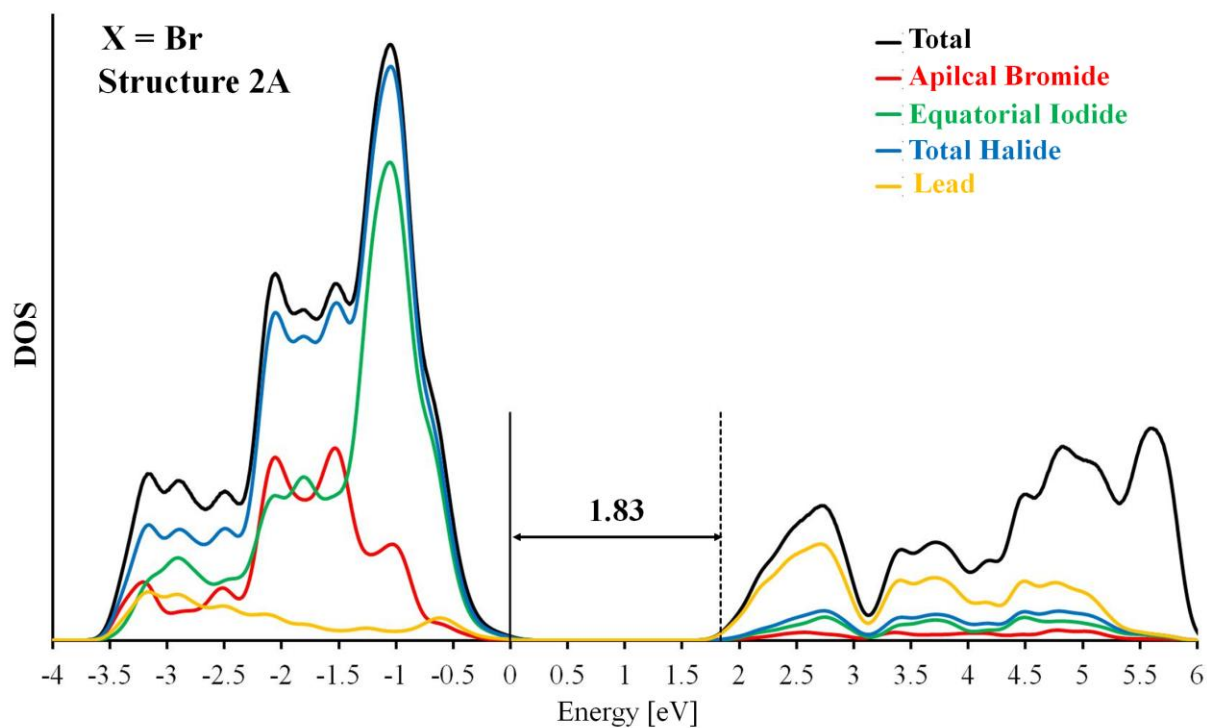

**Figure S6.** PDOS of the  $\text{PbI}_2\text{Br}$  structure 2A. Energy values are scaled setting the HOMO level as zero.

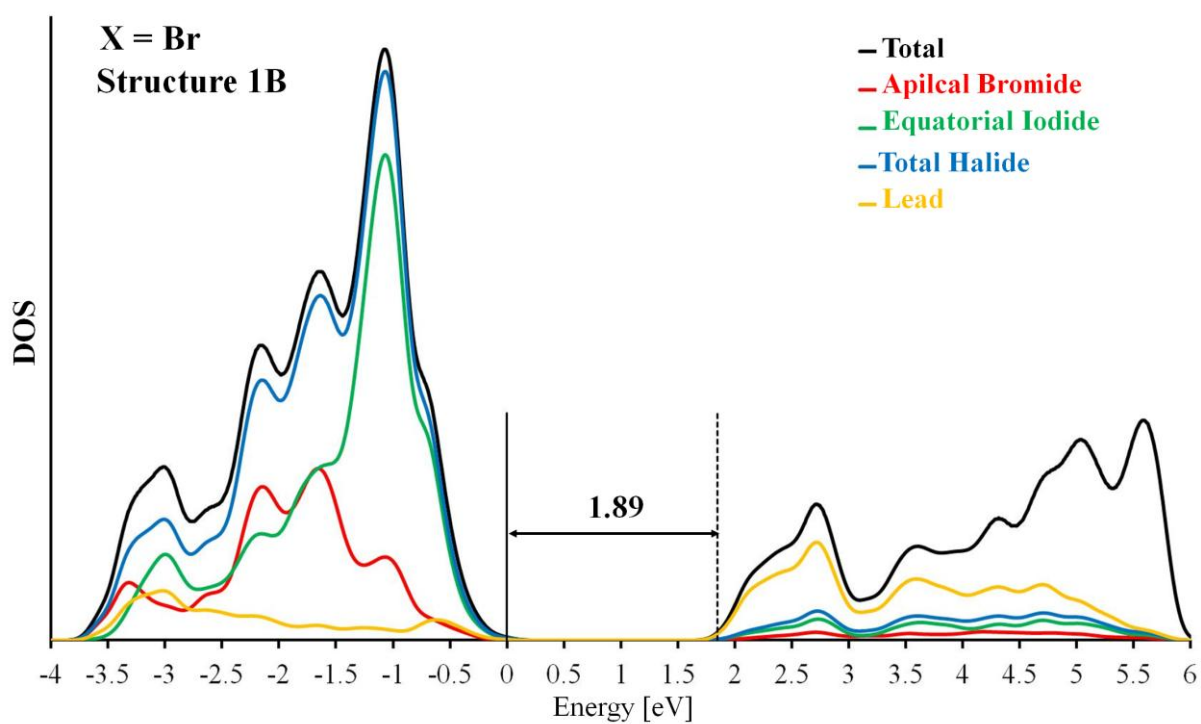

**Figure S7.** PDOS of the  $\text{PbI}_2\text{Br}$  structure 1B. Energy values are scaled setting the HOMO level as zero.

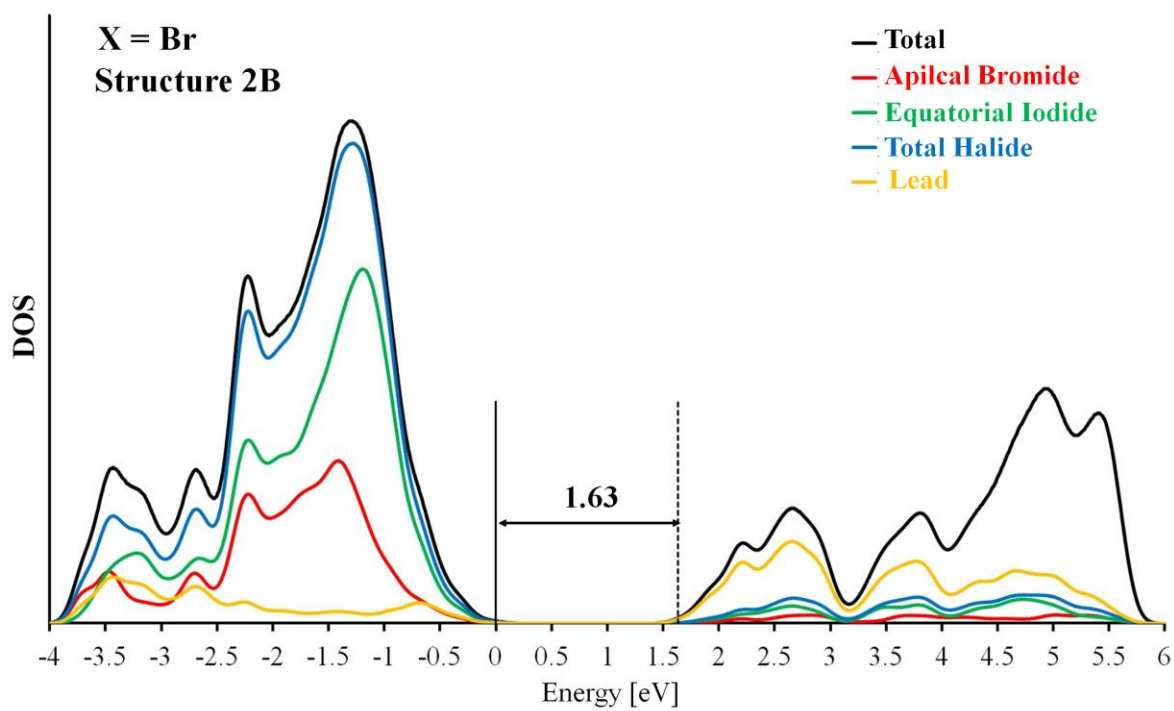

**Figure S8.** PDOS of the  $\text{PbI}_2\text{Br}$  structure 2B. Energy values are scaled setting the HOMO level as zero.

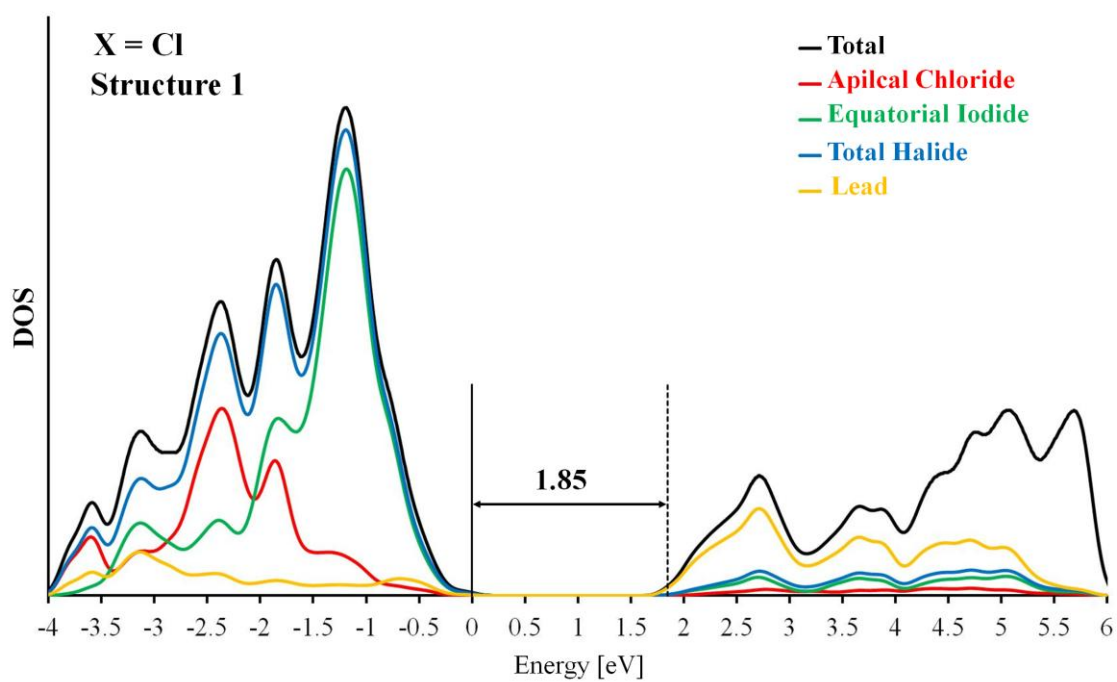

**Figure S9.** PDOS of the  $\text{PbI}_2\text{Cl}$  structure 1. Energy values are scaled setting the HOMO level as zero.

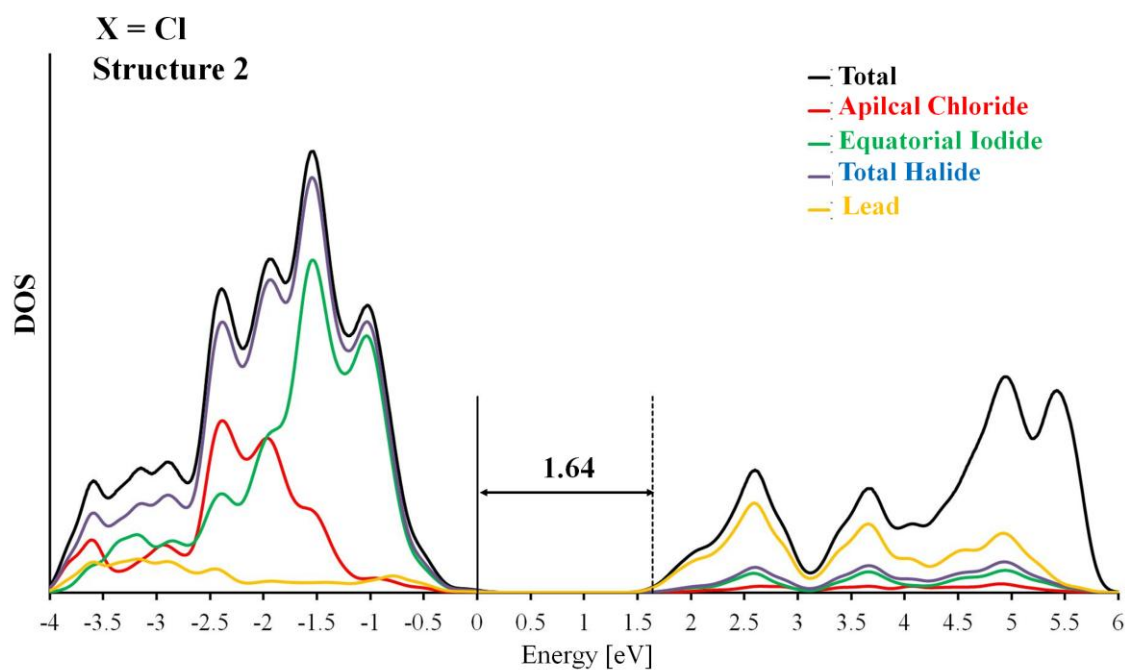

**Figure S10.** PDOS of the  $\text{PbI}_2\text{Cl}$  structure 2. Energy values are scaled setting the HOMO level as zero.



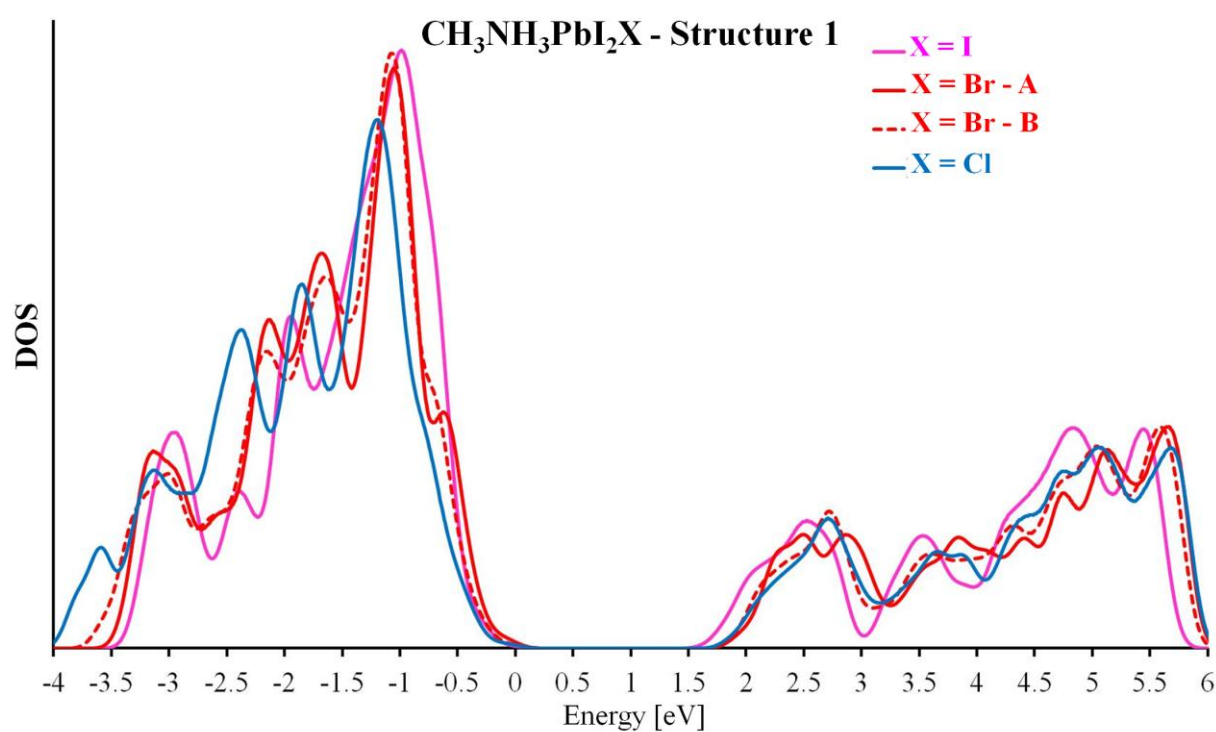

**Figure S11.** Total DOS for X = I, Br and Cl in structure 1. Energy values are scaled setting the HOMO level as zero.

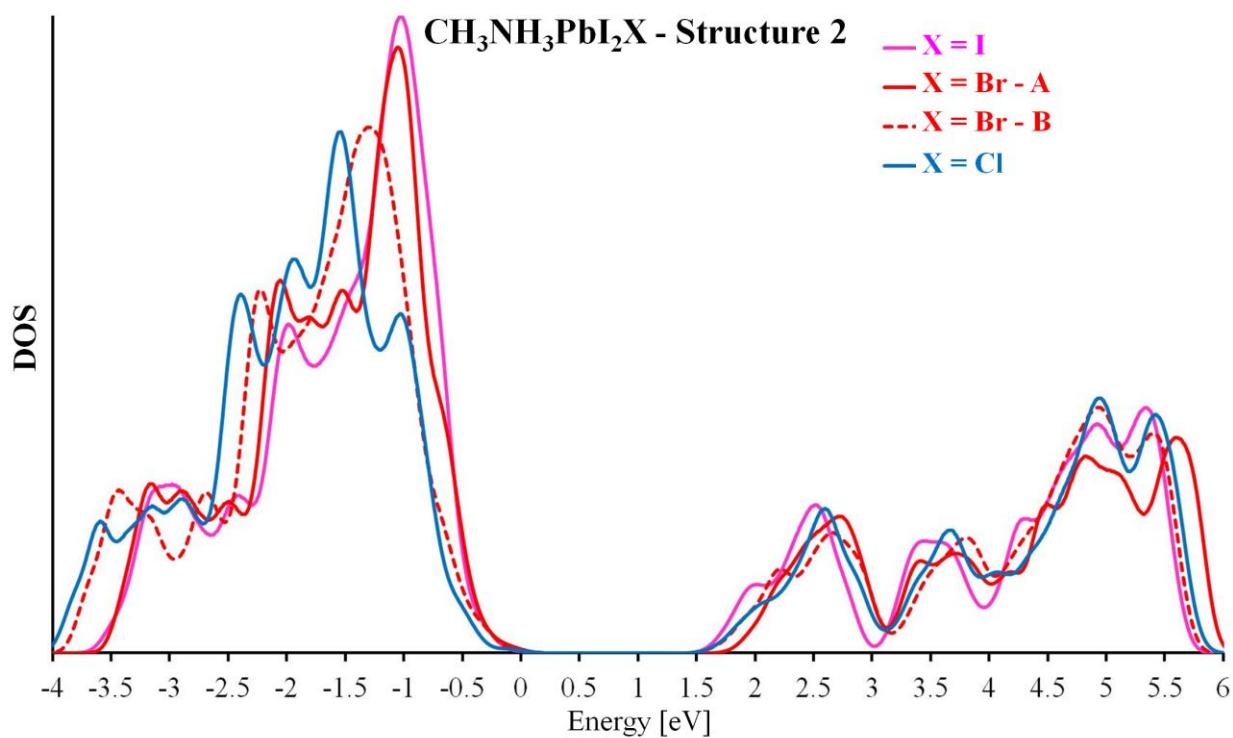

**Figure S12.** Total DOS for X = I, Br and Cl in structure 2. Energy values are scaled setting the HOMO level as zero.



4. Bands structure analysis

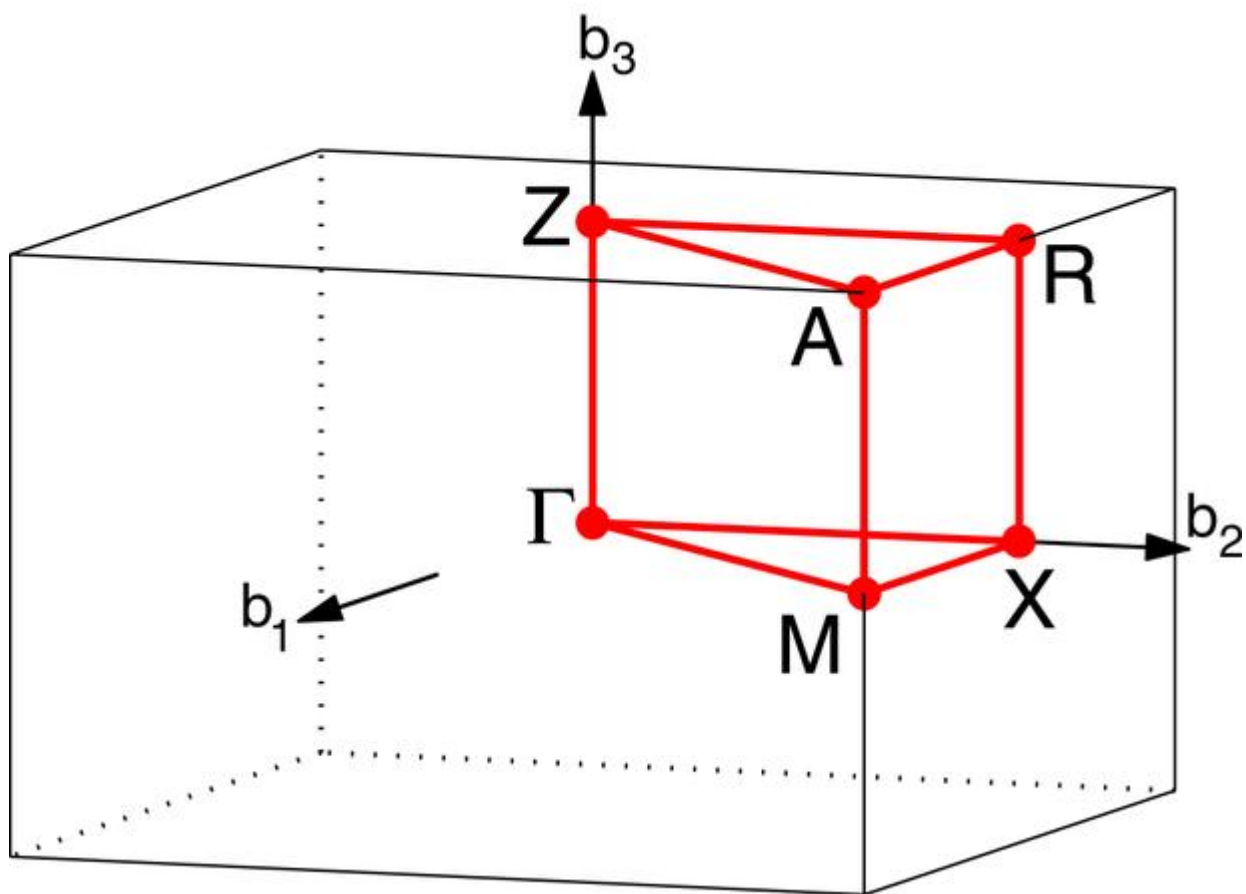

**Figure S13.** Scheme of the Brillouin Zone for a tetragonal lattice. Adapted from W. Setyawan and S. Curtarolo, Computational Materials Science, 2010, 49, 299.

A)

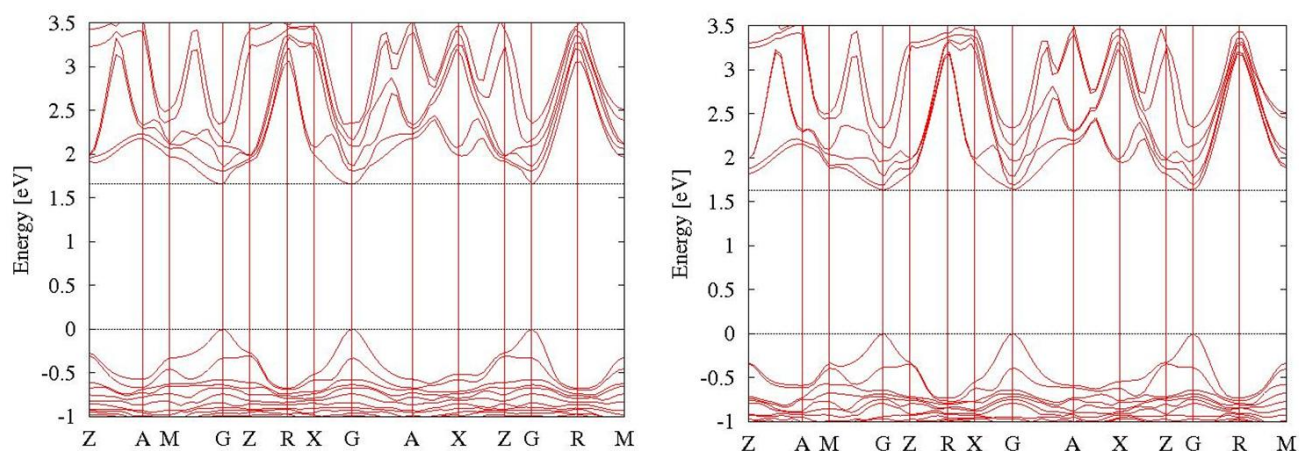

B)

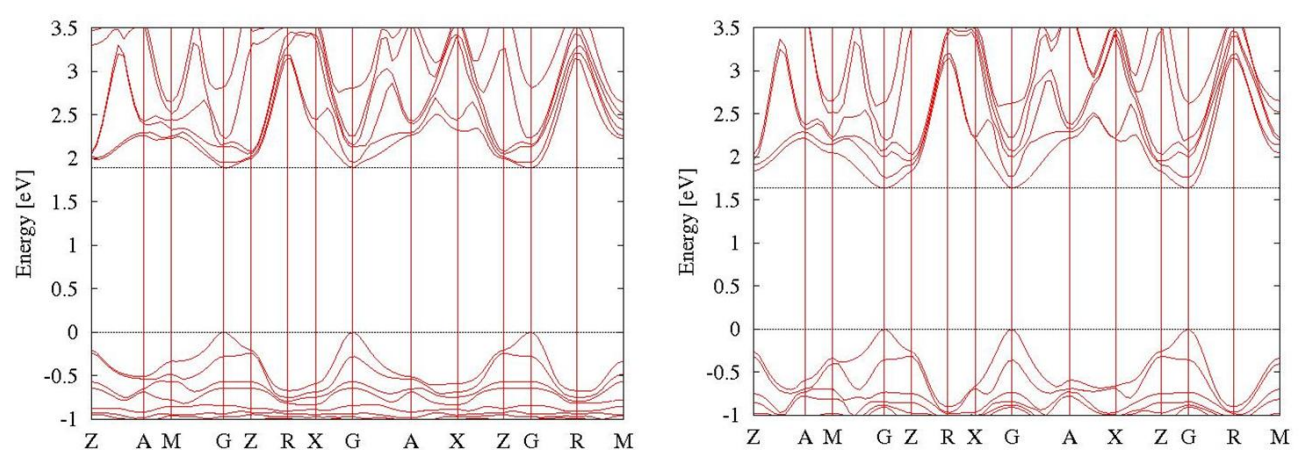

C)

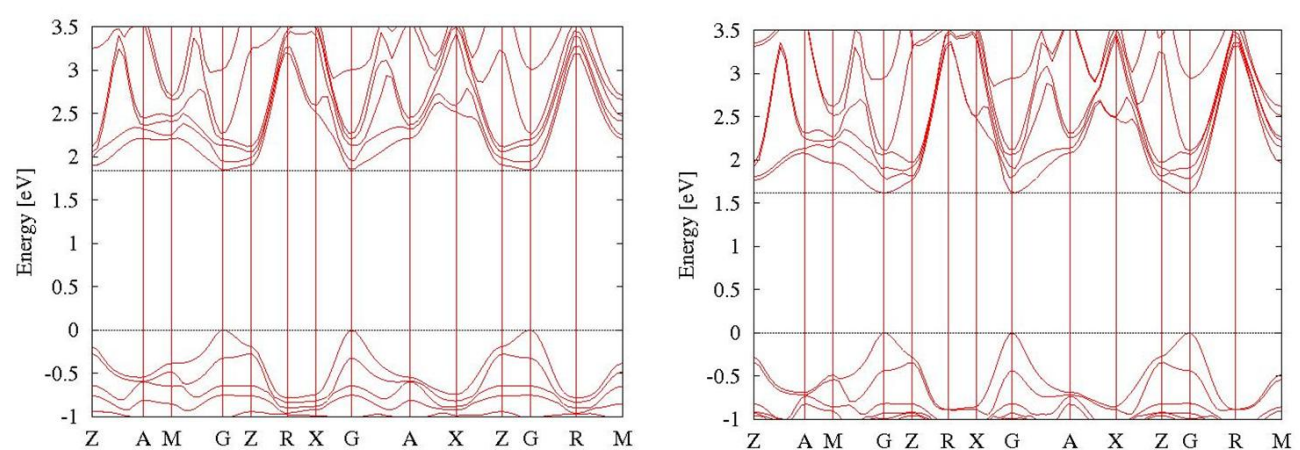

**Figure S14.** Bands structure of the investigated systems: (A)  $\text{CH}_3\text{NH}_3\text{PbI}_3$  for structure 1 (left) and 2 (right); (B)  $\text{CH}_3\text{NH}_3\text{PbI}_2\text{Br}$  for structure 1B (left) and 2B (right); (C)  $\text{CH}_3\text{NH}_3\text{PbI}_2\text{Cl}$  for structure 1 (left) and 2 (right). Energy values are scaled setting the HOMO energy as zero.

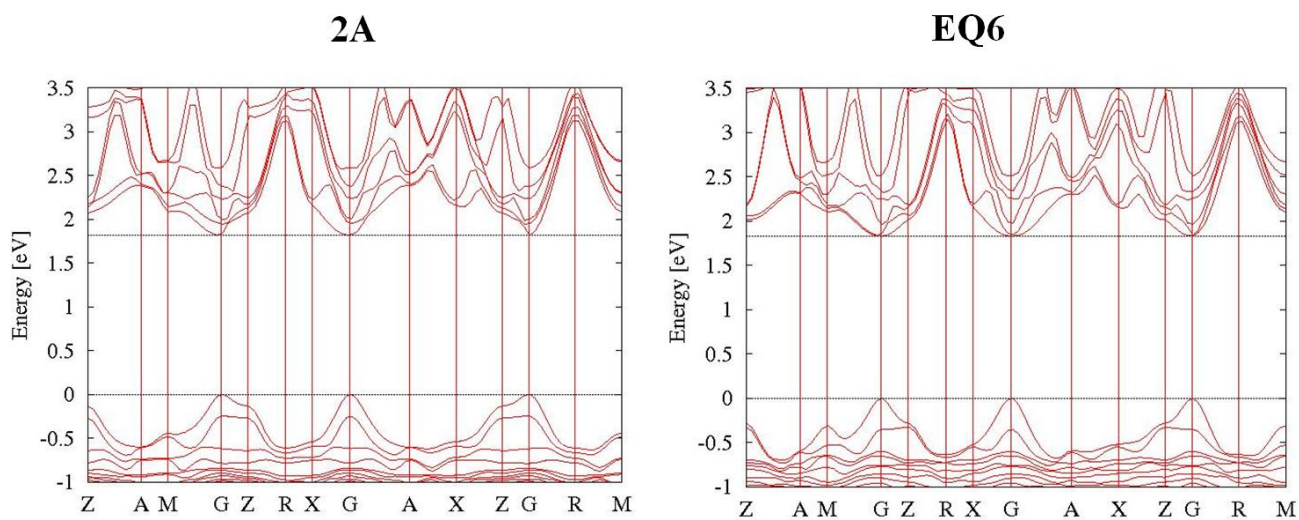

**Figure S15.** Bands structure of  $\text{CH}_3\text{NH}_3\text{PbI}_2\text{Br}$  for structure 2A (left) and EQ6 (right) are shown. Energy values are scaled setting the HOMO energy as zero.
